# Supplementary material
Source: PubMed Central journal article supplement (PMC2802525)
Supplement: supp_193_1_25__1.pdf [file supp_193_1_25__1.pdf]

**Table DS1** Severity of white-matter hyperintensity scores across separate psychosis subgroups and healthy controls

| Severity scores <sup>a</sup>                   | Overall psychosis group<br>( <i>n</i> =129) | Affective psychosis<br>( <i>n</i> = 53) | Schizophrenia/<br>schizophreniform psychosis<br>( <i>n</i> =64) | Bipolar disorder<br>( <i>n</i> =25) | Unipolar depression<br>( <i>n</i> =28) | Controls<br>( <i>n</i> =102) | Statistical significance (Kruskal–Wallis tests) |                                                                  |                                               |
|------------------------------------------------|---------------------------------------------|-----------------------------------------|-----------------------------------------------------------------|-------------------------------------|----------------------------------------|------------------------------|-------------------------------------------------|------------------------------------------------------------------|-----------------------------------------------|
|                                                |                                             |                                         |                                                                 |                                     |                                        |                              | Patients <i>v.</i> controls<br><i>P</i>         | Affective <i>v.</i> non-affective <i>v.</i> controls<br><i>P</i> | Diagnostic subgroups <sup>b</sup><br><i>P</i> |
| Total white-matter hyperintensities, mean rank | 113.77                                      | 105.78                                  | 110.10                                                          | 113.88                              | 98.55                                  | 118.82                       | 0.464                                           | 0.752                                                            | 0.609                                         |
| <i>Deep white-matter hyperintensities</i>      |                                             |                                         |                                                                 |                                     |                                        |                              |                                                 |                                                                  |                                               |
| Total, mean rank                               | 115.57                                      | 107.52                                  | 111.95                                                          | 115.48                              | 100.41                                 | 116.54                       | 0.886                                           | 0.886                                                            | 0.678                                         |
| Frontal <sup>c</sup>                           | 100/18/2/1/6/0/2                            | 41/7/2/0/2/0/1                          | 49/10/0/1/3/0/1                                                 | 18/2/2/0/2/0/1                      | 23/5/0/0/0/0/0                         | 81/15/3/2/1/0/0              |                                                 |                                                                  |                                               |
| Mean rank                                      | 117.33                                      | 111.28                                  | 111.89                                                          | 119.30                              | 104.13                                 | 114.31                       | 0.635                                           | 0.853                                                            | 0.621                                         |
| Parietal <sup>c</sup>                          | 115/8/1/1/2/2/0                             | 47/4/1/1/0/0/0                          | 57/4/0/0/2/1/0                                                  | 21/2/1/1/0/0/0                      | 26/2/0/0/0/0/0                         | 87/8/5/1/1/0/0               |                                                 |                                                                  |                                               |
| Mean rank                                      | 114.11                                      | 108.21                                  | 108.17                                                          | 113.60                              | 103.39                                 | 118.39                       | 0.401                                           | 0.737                                                            | 0.653                                         |

a. Measures are reported as the mean rank of the obtained scores on Scheltens scale for each separate variable (total, total deep, deep frontal and deep parietal ratings).  
b. Schizophrenia/schizophreniform psychosis *v.* bipolar disorder *v.* unipolar major depression *v.* controls.  
c. Number of individuals presenting Scheltens scale scores of: 0 (absent); 1 (up to 3 mm and a maximum of 5 lesions); 2 (6 or more lesions up to 3 mm); 3 (up to 5 lesions of 4 to 10 mm); 4 (6 or more lesions of 4 to 10mm); 5 (at least one lesion of more than 10 mm); 6 (confluent lesions).
